# Supplementary material for: Organic salt of hydrogenl-tartaric acid: a novel wide-temperature-range ferroelectrics with a reversible phase transition
Source: Royal Society of Chemistry journal article supplement (doi:10.1039/c0ce00109k), 2010-09-08
Supplement: c0ce00109k.pdf [file c0ce00109k.pdf]

## Supplementary Materials

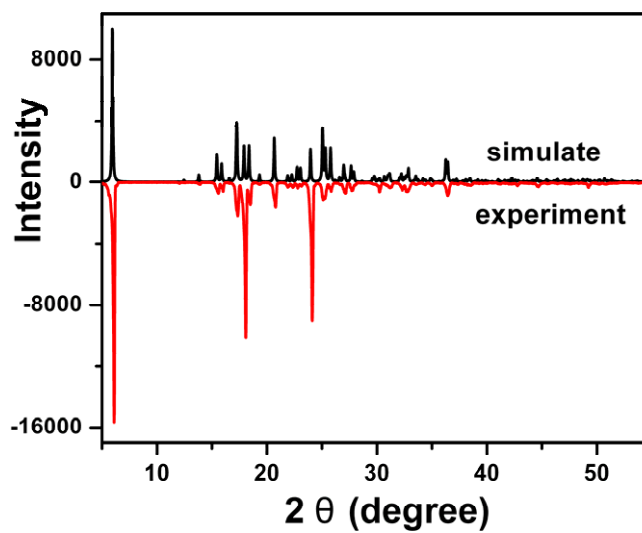

Fig. S1 The experimental and simulated PXRD diagram of compound 1 for RT phase.

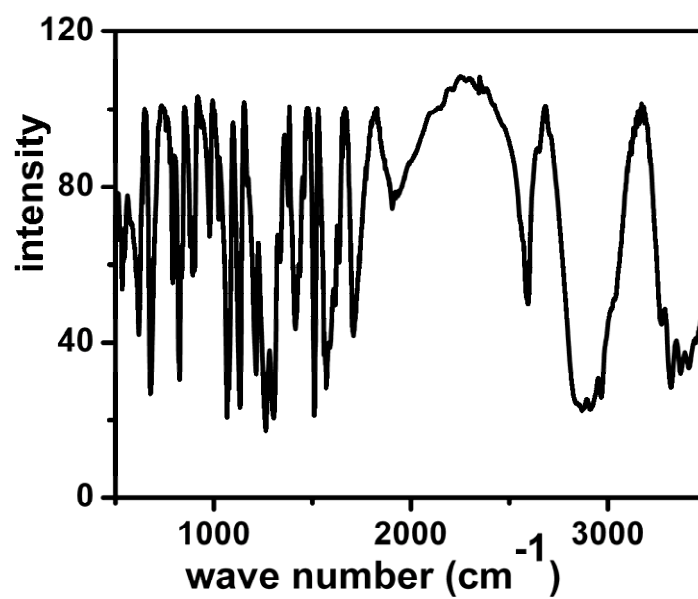

Fig. S2 The IR Spectrum of compound 1 at room temperature I for RT phase.
